# Supplementary material for: Extracellular-Vesicle-Based Cancer Panels Diagnose Glioblastomas with High Sensitivity and Specificity
Source: Cancers (Basel). 2023 Jul 26;15(15):3782. doi: 10.3390/cancers15153782 (PMC10417317; doi:10.3390/cancers15153782)
Supplement: Supplementary file 1 [file cancers-15-03782-s001.zip]

Archive with 5 entries (5 files):
- Suppl Material 1.pdf
- Supplementary_Figure S2.pptx
- Supplementary_Table S1.xlsx
- Supplementary_Table S2.xlsx
- Supplementary_Table S3.xlsx
