# Supplementary material for: Extracellular-Vesicle-Based Cancer Panels Diagnose Glioblastomas with High Sensitivity and Specificity
Source: Cancers (Basel). 2023 Jul 26;15(15):3782. doi: 10.3390/cancers15153782 (PMC10417317; doi:10.3390/cancers15153782)
Supplement: Supplementary file 1 [file cancers-15-03782-s001.zip › Supplementary_Table S1.xlsx]

## Sheet: Sheet1
gene	gene_name	log2FC	logCPM	PValue	FDR
ENSG00000202054	RNA5SP152	-3.52	4.02	1.48e-13	6.06e-09
ENSG00000283433	RNA5SP532	-3.32	4.9	4.25e-13	8.7e-09
ENSG00000207277	RNA5SP284	-2.69	3.23	6.66e-12	9.08e-08
ENSG00000175602	CCDC85B	-2.53	3.45	1.78e-10	1.69e-06
ENSG00000272435	RNA5SP357	-2.61	3.04	2.07e-10	1.69e-06
ENSG00000221716	SNORA11	-2.2	3.22	5.13e-10	3.5e-06
ENSG00000077984	CST7	-3.56	5.54	8.56e-10	5e-06
ENSG00000189343	RPS2P46	-2.47	4.34	1.11e-09	5.65e-06
ENSG00000196704	AMZ2	-1.01	4.87	2.78e-09	1.26e-05
ENSG00000239437	RN7SL752P	-2.11	5.78	3.26e-09	1.33e-05
ENSG00000171823	FBXL14	-1.3	3.88	7.51e-09	2.79e-05
ENSG00000200278	RNA5SP352	-2.33	2.43	8.65e-09	2.95e-05
ENSG00000200225	RNA5SP382	-2.83	4.02	1.29e-08	4.06e-05
ENSG00000275807	AC145285.6	-1.75	3.29	2.19e-08	6.4e-05
ENSG00000200626	RNA5SP325	-2.62	4.88	3.3e-08	9.01e-05
ENSG00000108107	RPL28	-1.99	7.74	3.6e-08	9.2e-05
ENSG00000236552	RPL13AP5	-2.23	4.84	3.93e-08	9.44e-05
ENSG00000240972	MIF	-2.45	2.4	4.36e-08	9.91e-05
ENSG00000130725	UBE2M	-1.08	4.39	5.29e-08	0.000103
ENSG00000199455	RNA5SP191	-2.6	3.24	5.12e-08	0.000103
ENSG00000223203	RNA5SP221	-2.66	6	4.89e-08	0.000103
ENSG00000201413	RNA5SP141	-2.95	4.53	6.07e-08	0.000113
ENSG00000213442	RPL18AP3	-2.24	4.19	7e-08	0.000124
ENSG00000188042	ARL4C	-1.04	4.63	7.71e-08	0.00013
ENSG00000227220	AL133346.1	-2.4	3.18	7.94e-08	0.00013
ENSG00000123144	TRIR	-1.84	4.68	8.88e-08	0.00014
ENSG00000063177	RPL18	-1.59	6.43	1.09e-07	0.000154
ENSG00000104964	TLE5	-1.09	5.67	1.08e-07	0.000154
ENSG00000105640	RPL18A	-2.29	7.49	1.07e-07	0.000154
ENSG00000115268	RPS15	-2.29	6.22	1.25e-07	0.00016
ENSG00000167526	RPL13	-1.86	7.25	1.24e-07	0.00016
ENSG00000185262	UBALD2	-1.75	3.88	1.25e-07	0.00016
ENSG00000130522	JUND	-1.94	3.29	1.3e-07	0.000161
ENSG00000232531	AC027612.3	-1.52	3.41	1.34e-07	0.000161
ENSG00000122122	SASH3	-1.01	4.71	1.74e-07	0.000183
ENSG00000142409	ZNF787	-1.01	4.36	1.76e-07	0.000183
ENSG00000179144	GIMAP7	-1.33	5.63	1.59e-07	0.000183
ENSG00000202422	RNA5SP30	-2.78	5.18	1.75e-07	0.000183
ENSG00000212154	RNA5SP377	-2.65	5.41	1.65e-07	0.000183
ENSG00000244642	RN7SL396P	-2.23	8.27	1.79e-07	0.000183
ENSG00000223791	UBE2E1-AS1	-1.72	3.63	2.06e-07	0.000206
ENSG00000137818	RPLP1	-2.32	7.21	2.97e-07	0.000282
ENSG00000244230	RN7SL151P	-1.27	4.25	3.27e-07	0.000304
ENSG00000200601	RNA5SP50	-2.42	4.33	4.15e-07	0.000377
ENSG00000212312	RNA5SP109	-2.56	2.97	4.59e-07	0.000409
ENSG00000262074	SNORD3B-2	-1.91	3.4	4.85e-07	0.000422
ENSG00000202187	RNA5SP355	-2.39	3.69	5.05e-07	0.00043
ENSG00000252010	SCARNA5	-1.91	3.39	5.15e-07	0.00043
ENSG00000142541	RPL13A	-2.42	8.77	5.74e-07	0.00047
ENSG00000167641	PPP1R14A	-1.14	3.95	6.26e-07	0.000487
ENSG00000200741	RNA5SP161	-1.41	5.71	6.25e-07	0.000487
ENSG00000230951	GPS2P2	-1.41	4.52	6.31e-07	0.000487
ENSG00000264940	SNORD3C	-2.64	7.24	7.01e-07	0.000531
ENSG00000223138	RNA5SP450	-2.65	6.09	7.33e-07	0.000545
ENSG00000202092	RNA5SP190	-2.01	2.88	8.5e-07	0.00061
ENSG00000251898	SCARNA11	-2.2	3.22	8.43e-07	0.00061
ENSG00000213049	HNRNPA1P34	1.16	3.44	9.72e-07	0.000685
ENSG00000188846	RPL14	-1.46	7.45	1.01e-06	0.000693
ENSG00000263934	SNORD3A	-2.5	7.96	1.02e-06	0.000693
ENSG00000214485	RPL7P1	-2.06	4.84	1.11e-06	0.000744
ENSG00000127528	KLF2	-1.26	3.99	1.18e-06	0.000779
ENSG00000074071	MRPS34	-1.13	3.14	1.22e-06	0.000782
ENSG00000197747	S100A10	-1.8	4.66	1.22e-06	0.000782
ENSG00000169442	CD52	-1.95	5.35	1.32e-06	0.000821
ENSG00000169100	SLC25A6	-1.62	5.03	1.4e-06	0.000833
ENSG00000172531	PPP1CA	-1.24	4.47	1.4e-06	0.000833
ENSG00000177600	RPLP2	-2.35	7.6	1.38e-06	0.000833
ENSG00000240869	RN7SL128P	-1.93	2.63	1.45e-06	0.000848
ENSG00000105372	RPS19	-1.59	6.71	1.56e-06	0.000866
ENSG00000165527	ARF6	-1.43	4.93	1.58e-06	0.000866
ENSG00000199454	RNA5SP388	-1.59	3.16	1.54e-06	0.000866
ENSG00000233762	RPS15P4	-2.33	4.2	1.61e-06	0.000866
ENSG00000188243	COMMD6	-1.28	4.82	1.67e-06	0.000877
ENSG00000147403	RPL10	-1.67	6.72	1.8e-06	0.00093
ENSG00000110700	RPS13	-1.7	5.88	1.83e-06	0.000934
ENSG00000169429	CXCL8	-2.1	3.64	2.02e-06	0.00101
ENSG00000142168	SOD1	-1.41	4.67	2.09e-06	0.00103
ENSG00000142634	EFHD2	-1.2	5.18	2.12e-06	0.00103
ENSG00000197958	RPL12	-1.81	7.52	2.19e-06	0.00105
ENSG00000107223	EDF1	-1.12	5.22	2.26e-06	0.00108
ENSG00000234779	BNC2-AS1	-1.49	2.71	2.44e-06	0.00111
ENSG00000272097	AL024498.1	1.19	2.82	2.42e-06	0.00111
ENSG00000235552	RPL6P27	-2	3.5	2.66e-06	0.0012
ENSG00000167658	EEF2	-1.71	7.27	2.88e-06	0.00128
ENSG00000143590	EFNA3	-1.27	3.31	3.01e-06	0.00131
ENSG00000171530	TBCA	-1.51	4.53	3.02e-06	0.00131
ENSG00000104093	DMXL2	1.07	5.79	3.15e-06	0.00134
ENSG00000103226	NOMO3	-1.11	3.63	3.2e-06	0.00135
ENSG00000228209	PNPP1	1.6	2.35	3.31e-06	0.00137
ENSG00000252604	RNU2-44P	-1.84	3.55	3.29e-06	0.00137
ENSG00000286809	AC008964.1	1.29	2.75	3.38e-06	0.00138
ENSG00000275305	RNA5SP528	-1.95	4.43	3.46e-06	0.0014
ENSG00000011600	TYROBP	-1.79	4.41	3.77e-06	0.0015
ENSG00000115738	ID2	-1.25	3.71	3.97e-06	0.0015
ENSG00000197728	RPS26	-1.54	5.82	3.96e-06	0.0015
ENSG00000198830	HMGN2	-1.71	4.67	3.83e-06	0.0015
ENSG00000202056	RNA5SP19	-2.37	6.59	3.96e-06	0.0015
ENSG00000212994	RPS26P6	-2.28	3.51	4.13e-06	0.00155
ENSG00000146278	PNRC1	-1.57	5.44	4.19e-06	0.00155
ENSG00000204472	AIF1	-1.23	5.16	4.21e-06	0.00155
ENSG00000165502	RPL36AL	-1.97	6.43	4.54e-06	0.00166
ENSG00000204628	RACK1	-1.52	7.33	4.62e-06	0.00167
ENSG00000140988	RPS2	-2.08	6.38	4.98e-06	0.00177
ENSG00000109971	HSPA8	-1.57	6.74	5.17e-06	0.00182
ENSG00000133574	GIMAP4	-1.39	6.26	5.3e-06	0.00185
ENSG00000117091	CD48	-1.13	5.23	5.35e-06	0.00186
ENSG00000198242	RPL23A	-2.32	9.05	5.54e-06	0.0019
ENSG00000108298	RPL19	-2.1	8.57	5.66e-06	0.00193
ENSG00000166441	RPL27A	-1.44	7.13	5.84e-06	0.00194
ENSG00000235162	C12orf75	-1.82	5.14	5.81e-06	0.00194
ENSG00000137460	FHDC1	-1.29	6.94	6.22e-06	0.00197
ENSG00000180747	SMG1P3	-1.44	3.3	6.15e-06	0.00197
ENSG00000201148	RNA5SP42	-2.11	6.31	6.1e-06	0.00197
ENSG00000203782	LORICRIN	-1.07	3.17	6.08e-06	0.00197
ENSG00000125534	PPDPF	-2.22	6.27	6.5e-06	0.00198
ENSG00000129757	CDKN1C	-1.17	2.83	6.44e-06	0.00198
ENSG00000145287	PLAC8	-1.06	5.34	6.47e-06	0.00198
ENSG00000227097	RPS28P7	-2.31	4.68	6.48e-06	0.00198
ENSG00000127184	COX7C	-1.81	6.38	6.65e-06	0.00202
ENSG00000130770	ATP5IF1	-1.35	4.78	6.77e-06	0.00204
ENSG00000161016	RPL8	-1.84	6.73	7.08e-06	0.00208
ENSG00000227507	LTB	-1.01	4.1	7.25e-06	0.00212
ENSG00000198087	CD2AP	-1.02	5.01	7.32e-06	0.00212
ENSG00000179431	FJX1	-1.15	3.04	7.41e-06	0.00213
ENSG00000130741	EIF2S3	-1.09	5.54	8.51e-06	0.00231
ENSG00000136167	LCP1	-1.25	6.81	8.69e-06	0.00231
ENSG00000198034	RPS4X	-1.63	7.85	8.77e-06	0.00231
ENSG00000236258	TIMM8BP1	1.28	2.53	8.68e-06	0.00231
ENSG00000130255	RPL36	-1.55	6.33	9.49e-06	0.00242
ENSG00000200310	RNA5SP215	-2.37	7.19	9.49e-06	0.00242
ENSG00000260727	SLC7A5P1	-1.68	3.01	9.41e-06	0.00242
ENSG00000108518	PFN1	-1.97	6.4	1e-05	0.0025
ENSG00000128340	RAC2	-1.29	5.61	1e-05	0.0025
ENSG00000228100	LINC01820	1.17	2.76	1.02e-05	0.00252
ENSG00000144713	RPL32	-1.65	7.38	1.03e-05	0.00255
ENSG00000073756	PTGS2	-1.19	3.68	1.06e-05	0.00259
ENSG00000240342	RPS2P5	-1.5	3.72	1.08e-05	0.0026
ENSG00000222076	RNU2-3P	-1.89	3.48	1.1e-05	0.00263
ENSG00000245910	SNHG6	-1.94	5.09	1.13e-05	0.00263
ENSG00000277739	FP671120.4	-3.19	6.54	1.13e-05
ENSG00000172809	RPL38	-1.75	7.8	1.14e-05
ENSG00000214100	PLAC9P1	-1.01	4.32	1.18e-05
ENSG00000089157	RPLP0	-1.82	7.54	1.2e-05
ENSG00000100316	RPL3	-1.67	8.05	1.21e-05
ENSG00000114391	RPL24	-1.64	6.62	1.2e-05
ENSG00000184897	H1-10	-1.12	3.69	1.28e-05
ENSG00000232888	RPS11P5	-1.66	3.68	1.32e-05
ENSG00000176396	EID2	-1.22	3.08	1.35e-05
ENSG00000212242	RNA5SP219	-2.25	6.68	1.39e-05
ENSG00000273258	AC016737.2	-1.02	2.97	1.4e-05
ENSG00000287386	AC009248.3	1.13	2.93	1.41e-05
ENSG00000122026	RPL21	-1.94	6.81	1.51e-05
ENSG00000184260	H2AC20	-2.09	3.94	1.53e-05
ENSG00000174021	GNG5	-1.63	2.99	1.58e-05
ENSG00000034510	TMSB10	-1.83	6.78	1.62e-05
ENSG00000131469	RPL27	-1.98	7.86	1.68e-05
ENSG00000198755	RPL10A	-1.6	5.78	1.68e-05
ENSG00000131094	C1QL1	-1.04	3.1	1.7e-05
ENSG00000010404	IDS	-1.1	3.62	1.71e-05
ENSG00000149806	FAU	-1.59	6.28	1.81e-05
ENSG00000106153	CHCHD2	-1.36	3.55	1.86e-05
ENSG00000233476	EEF1A1P6	-1.53	3.07	1.87e-05
ENSG00000100564	PIGH	-1	3.18	1.91e-05
ENSG00000105701	FKBP8	-1.24	6.35	1.92e-05
ENSG00000136942	RPL35	-1.86	7.03	1.89e-05
ENSG00000143947	RPS27A	-1.94	7.95	1.95e-05
ENSG00000199415	RNA5SP370	-1.8	4.09	1.93e-05
ENSG00000200408	RNA5SP74	-1.8	4.1	1.94e-05
ENSG00000206917	RNU1-52P	-1.9	3.57	1.96e-05
ENSG00000263740	RN7SL4P	-2.2	11.19	1.94e-05
ENSG00000279730	KMT5AP1	-1.39	2.78	1.91e-05
ENSG00000267472	ARHGAP27P2	-1.44	2.39	2e-05
ENSG00000169019	COMMD8	-1.59	2.92	2.02e-05
ENSG00000105193	RPS16	-1.53	6.43	2.15e-05
ENSG00000110852	CLEC2B	-1.54	3.52	2.14e-05
ENSG00000128016	ZFP36	-1.36	4.33	2.15e-05
ENSG00000102879	CORO1A	-1.12	5.68	2.17e-05
ENSG00000264573	RN7SL15P	-1.6	2.31	2.18e-05
ENSG00000091527	CDV3	-1.06	5.4	2.22e-05
ENSG00000171860	C3AR1	1.12	2.65	2.29e-05
ENSG00000103363	ELOB	-1.46	4.42	2.37e-05
ENSG00000204287	HLA-DRA	-1.5	5.26	2.4e-05
ENSG00000149273	RPS3	-1.49	7.64	2.48e-05
ENSG00000198918	RPL39	-1.89	6.83	2.49e-05
ENSG00000231500	RPS18	-2.02	7.85	2.48e-05
ENSG00000256357	AL132708.1	1.12	2.98	2.46e-05
ENSG00000146677	AC004453.1	-1.19	2.82	2.53e-05
ENSG00000114942	EEF1B2	-1.72	6.83	2.6e-05
ENSG00000104529	EEF1D	-1	6.76	2.63e-05
ENSG00000240350	SOCAR	1.42	2.4	2.63e-05
ENSG00000083845	RPS5	-1.27	5.66	2.67e-05
ENSG00000174748	RPL15	-1.63	7.36	2.67e-05
ENSG00000145592	RPL37	-1.48	7.59	2.72e-05
ENSG00000168298	H1-4	-1.97	6.35	2.74e-05
ENSG00000248136	MTND6P8	1	3.92	2.79e-05
ENSG00000026025	VIM	-1.5	6.6	2.84e-05
ENSG00000148303	RPL7A	-1.44	6.75	2.84e-05
ENSG00000249893	MTND6P16	1.23	3.56	2.93e-05
ENSG00000233927	RPS28	-1.17	5.31	2.95e-05
ENSG00000152518	ZFP36L2	-1.31	4.07	3.24e-05
ENSG00000162244	RPL29	-1.72	6.84	3.28e-05
ENSG00000172216	CEBPB	-1.51	3.05	3.31e-05
ENSG00000212232	SNORD17	-1.75	3.8	3.31e-05
ENSG00000212251	RNA5SP376	-2.08	5.14	3.45e-05
ENSG00000222426	RNU2-50P	-1.82	3.95	3.68e-05
ENSG00000224631	RPS27AP16	-1.47	4.41	3.68e-05
ENSG00000102409	BEX4	-1.08	3.89	3.75e-05
ENSG00000105329	TGFB1	-1.55	7	3.73e-05
ENSG00000125691	RPL23	-1.58	7.59	3.82e-05
ENSG00000156508	EEF1A1	-1.95	9.13	3.71e-05
ENSG00000168028	RPSA	-1.45	6.72	3.8e-05
ENSG00000183527	PSMG1	-1.15	4.41	3.82e-05
ENSG00000278877	AC091932.2	1.69	2.08	3.87e-05
ENSG00000196205	EEF1A1P5	-2.19	7.91	3.95e-05
ENSG00000250827	MFSD4BP1	1.09	3.04	3.94e-05
ENSG00000253697	AC103834.1	-1.65	2.2	4.06e-05
ENSG00000105374	NKG7	-1.37	4.77	4.09e-05
ENSG00000134046	MBD2	-1.18	5.82	4.17e-05
ENSG00000177105	RHOG	-1.02	4.77	4.17e-05
ENSG00000177954	RPS27	-2.09	8.87	4.15e-05
ENSG00000185885	IFITM1	-1.23	3.66	4.23e-05
ENSG00000090238	YPEL3	-1.02	4.76	4.26e-05
ENSG00000116251	RPL22	-1.47	7.32	4.4e-05
ENSG00000231660	RPS8P6	-1.11	2.66	4.37e-05
ENSG00000196531	NACA	-1.48	8.25	4.42e-05
ENSG00000132475	H3-3B	-1.49	5.91	4.59e-05
ENSG00000145337	PYURF	-1.41	2.96	4.62e-05
ENSG00000145425	RPS3A	-1.82	7.94	4.59e-05
ENSG00000234965	SHISA8	-1.04	3.2	4.62e-05
ENSG00000005022	SLC25A5	-1.16	4.27	4.7e-05
ENSG00000170889	RPS9	-1	6.47	4.71e-05
ENSG00000207115	RNU6-364P	-1.98	2.77	4.71e-05
ENSG00000264169	RN7SL665P	-1.26	2.98	4.7e-05
ENSG00000200058	RNA5SP218	-1.31	2.71	4.94e-05
ENSG00000104903	LYL1	-1.09	4.14	4.99e-05
ENSG00000118181	RPS25	-1.86	7.16	4.99e-05
ENSG00000163191	S100A11	-1.66	5.06	4.99e-05
ENSG00000142089	IFITM3	-1.21	4.39	5.15e-05
ENSG00000163466	ARPC2	-1.1	5.79	5.24e-05
ENSG00000229203	AC103564.1	-1.15	2.69	5.19e-05
ENSG00000251624	UNC93B7	-1.16	2.4	5.2e-05
ENSG00000211772	TRBC2	-1.18	3.95	5.36e-05
ENSG00000286155	FP671120.11	1.52	3.94	5.39e-05
ENSG00000197582	GPX1P1	-1.66	3.48	5.59e-05
ENSG00000171223	JUNB	-1.59	3.75	5.64e-05
ENSG00000171858	RPS21	-1.73	6.17	5.79e-05
ENSG00000224363	FP700111.1	1.36	2.13	5.92e-05
ENSG00000105058	FAM32A	-1.04	5.11	5.95e-05
ENSG00000100380	ST13	-1.24	5.67	6e-05
ENSG00000197956	S100A6	-1.3	4.92	6.12e-05
ENSG00000150593	PDCD4	-1.2	5.5	6.32e-05
ENSG00000161970	RPL26	-1.62	6.58	6.48e-05
ENSG00000137154	RPS6	-1.83	8.45	6.51e-05
ENSG00000092010	PSME1	-1.43	5.82	6.57e-05
ENSG00000225921	NOL7	-1.15	3.91	6.61e-05
ENSG00000244716	BX679664.3	-1.75	2.26	6.7e-05
ENSG00000128524	ATP6V1F	-1.01	4.73	6.78e-05
ENSG00000255221	CARD17	1.05	3.06	6.79e-05
ENSG00000201035	RNA5SP469	-1.38	3.36	6.87e-05
ENSG00000196683	TOMM7	-1.14	4.97	6.95e-05
ENSG00000099624	ATP5F1D	-1.15	3.77	7.16e-05
ENSG00000174444	RPL4	-1.55	8.38	7.2e-05
ENSG00000109062	SLC9A3R1	-1.03	4.41	7.39e-05
ENSG00000224040	HMGN1P4	-1.23	2.39	7.44e-05
ENSG00000241243	RN7SL629P	-1.48	2.4	7.56e-05
ENSG00000244389	RN7SL242P	-1.44	2.57	7.53e-05
ENSG00000196976	LAGE3	-1.04	2.89	7.64e-05
ENSG00000146386	ABRACL	-1.25	4.16	7.75e-05
ENSG00000205581	HMGN1	-1.39	4.82	7.89e-05
ENSG00000258429	PDF	-1.6	2.29	7.92e-05
ENSG00000132963	POMP	-1.01	3.68	7.95e-05
ENSG00000134419	RPS15A	-1.28	6.96	7.99e-05
ENSG00000277075	H2AC8	-1.73	5.25	8.82e-05
ENSG00000226084	AC113935.1	-1.85	4	8.87e-05
ENSG00000262107	MTND6P33	1.48	2.33	9e-05
ENSG00000275126	H4C13	-1.55	4.61	9.17e-05
ENSG00000237550	AC243919.1	-2.01	4.85	9.82e-05
ENSG00000142937	RPS8	-1.73	7.1	9.88e-05
ENSG00000119335	SET	-1.07	5.74	9.95e-05
ENSG00000228118	MYL6P5	1.15	2.34	0.000102
ENSG00000169704	GP9	-1.7	4.58	0.000103
ENSG00000243188	HNRNPA1P17	1.08	3.04	0.000104
ENSG00000102119	EMD	-1.03	3.9	0.000105
ENSG00000236510	AC011284.1	1.15	3.26	0.000106
ENSG00000232112	TMA7	-1.43	5.32	0.000109
ENSG00000272858	Z93930.3	1.32	2.23	0.000109
ENSG00000259944	CDRT7	1.47	2.14	0.000112
ENSG00000008988	RPS20	-1.84	7.9	0.000114
ENSG00000131174	COX7B	-1.25	3.71	0.000115
ENSG00000278196	IGLV2-8	1.31	2.34	0.000125
ENSG00000111229	ARPC3	-1.32	6.13	0.000126
ENSG00000286817	AC105339.6	1.04	2.62	0.000126
ENSG00000173812	EIF1	-1.66	6.92	0.000129
ENSG00000236348	PSMC1P10	1.38	2.56	0.00013
ENSG00000165233	CARD19	-1.07	5.01	0.000133
ENSG00000180596	H2BC4	-1.85	6.94	0.000133
ENSG00000181163	NPM1	-1.31	6.85	0.000133
ENSG00000186468	RPS23	-1.79	8.48	0.000132
ENSG00000276966	H4C5	-1.52	5.58	0.000132
ENSG00000156482	RPL30	-1.57	7.32	0.000137
ENSG00000223855	AC147651.1	-1.01	5.66	0.000139
ENSG00000164105	SAP30	-1.06	3.22	0.000141
ENSG00000171863	RPS7	-1.1	6.71	0.00014
ENSG00000188290	HES4	-1.46	2.28	0.00014
ENSG00000207181	SNORA14B	-1.73	3.92	0.000143
ENSG00000252261	RNA5SP262	-1	3.51	0.000146
ENSG00000122406	RPL5	-1.73	8.09	0.000149
ENSG00000133112	TPT1	-1.61	8.98	0.000149
ENSG00000236446	CT47B1	-1.06	3.4	0.000151
ENSG00000136003	ISCU	-1.01	5.01	0.000153
ENSG00000135486	HNRNPA1	-1.07	7.24	0.000153
ENSG00000149925	ALDOA	-1.03	5.17	0.000154
ENSG00000142534	RPS11	-1.71	7.55	0.000158
ENSG00000221983	UBA52	-1.2	7.04	0.00016
ENSG00000229418	AL136181.1	1	3.02	0.000164
ENSG00000200246	RNA5SP263	-1.86	6.26	0.000166
ENSG00000243352	RN7SL8P	-1.16	2.69	0.000167
ENSG00000225672	CCNT2P1	1.05	2.7	0.000168
ENSG00000164853	UNCX	-1.03	3.29	0.000177
ENSG00000196262	PPIA	-1.06	6.04	0.000177
ENSG00000071082	RPL31	-1.42	7.34	0.000186
ENSG00000271099	AL357315.2	1.01	2.87	0.000194
ENSG00000232526	VDAC1P13	1.08	2.53	0.000196
ENSG00000287048	AC096589.2	1.44	2.21	0.000202
ENSG00000163453	IGFBP7	-1.07	3.02	0.000209
ENSG00000222806	RNA5SP225	-1.64	3.75	0.000212
ENSG00000228015	AC074338.1	-1.4	2.79	0.000214
ENSG00000284688	AL121936.2	1.08	2.42	0.000217
ENSG00000236869	ZKSCAN7-AS1	-1.2	2.95	0.000223
ENSG00000235510	BX842568.4	-1.38	2.31	0.000229
ENSG00000162009	SSTR5	-1.18	2.82	0.000232
ENSG00000164346	NSA2	-1.43	5.14	0.000237
ENSG00000224876	AL121901.1	1.06	2.54	0.000239
ENSG00000187514	PTMA	-1.72	9.17	0.000241
ENSG00000138071	ACTR2	-1.39	5.9	0.000243
ENSG00000142676	RPL11	-1.52	7.44	0.000244
ENSG00000233167	EEF1A1P26	1.12	2.48	0.000245
ENSG00000057608	GDI2	-1.02	6.07	0.000257
ENSG00000202411	RNA5SP259	-1.81	4.23	0.000256
ENSG00000257453	AC011611.3	-1.15	4.89	0.000257
ENSG00000252179	RNA5SP255	-1.45	2.72	0.000258
ENSG00000080824	HSP90AA1	-1.13	6.74	0.00026
ENSG00000175895	PLEKHF2	-1.13	3.39	0.00026
ENSG00000169714	CNBP	-1.17	5.67	0.000264
ENSG00000258670	AL049874.3	-1.05	2.55	0.000263
ENSG00000283041	AC008038.1	-1.06	4.74	0.000263
ENSG00000169020	ATP5ME	-1.15	4.5	0.000265
ENSG00000134996	OSTF1	-1.37	4.55	0.000266
ENSG00000201041	RNA5SP242	-1.27	2.92	0.000268
ENSG00000143384	MCL1	-1.07	5.52	0.00027
ENSG00000252745	RNA5SP143	-2.03	6.87	0.00027
ENSG00000287654	AP002982.2	1.19	2.28	0.000272
ENSG00000145741	BTF3	-1.34	5.48	0.000285
ENSG00000233919	AC009743.1	1.09	2.77	0.000286
ENSG00000254960	KIRREL3-AS2	1.06	2.58	0.000287
ENSG00000198168	SVIP	-1.19	5.43	0.000295
ENSG00000230391	RPSAP23	1.23	2.17	0.000299
ENSG00000230202	AL450405.1	-1.44	4.37	0.000305
ENSG00000250180	AC074344.2	1.09	2.71	0.000308
ENSG00000227081	AC005912.1	-1.69	4.11	0.000313
ENSG00000213178	RPL22P1	-1.45	2.59	0.00032
ENSG00000259353	AC090515.5	-1.13	2.96	0.000324
ENSG00000167468	GPX4	-1.84	6.73	0.000327
ENSG00000183458	AC138932.1	-1.03	2.9	0.000337
ENSG00000198858	R3HDM4	-1.04	5.37	0.000337
ENSG00000158716	DUSP23	-1.02	2.68	0.000339
ENSG00000197364	S100A7L2	1.06	2.52	0.000338
ENSG00000089009	RPL6	-1.34	6.82	0.000343
ENSG00000281849	AL732314.8	-1.03	3.23	0.000349
ENSG00000163131	CTSS	-1.15	5.1	0.000352
ENSG00000197756	RPL37A	-1.24	7.04	0.000357
ENSG00000261195	AC027130.1	1.15	2.43	0.000357
ENSG00000217414	DDX18P3	1.25	2.24	0.000361
ENSG00000260879	AL359258.2	-1.25	2.32	0.000363
ENSG00000270938	RAP2CP1	-1.12	2.84	0.000367
ENSG00000243179	AC110769.1	1.22	2.19	0.000375
ENSG00000258099	ATXN2-AS	-1.19	2.75	0.00038
ENSG00000123349	PFDN5	-1.18	6.08	0.000382
ENSG00000171936	OR10H3	1.24	2.23	0.000385
ENSG00000230598	AL645937.3	1.05	2.65	0.000388
ENSG00000227714	MTND6P18	1.04	3.32	0.000395
ENSG00000111875	ASF1A	-1.1	2.99	0.000399
ENSG00000253733	LZTS1-AS1	1.03	2.69	0.000405
ENSG00000109475	RPL34	-1.48	7.69	0.000411
ENSG00000120738	EGR1	-1.15	5.33	0.00041
ENSG00000200795	RNU4-1	-1.33	4.23	0.000412
ENSG00000243885	AC108751.4	1.08	2.42	0.000409
ENSG00000118816	CCNI	-1.09	5.58	0.000415
ENSG00000259366	AC108449.2	1.13	2.51	0.000417
ENSG00000133872	SARAF	-1.1	4.52	0.000419
ENSG00000196860	TOMM20L	-1.29	2.16	0.000428
ENSG00000200997	RNVU1-34	1.26	2.11	0.000437
ENSG00000204525	HLA-C	-1.43	5.74	0.000439
ENSG00000263271	AC110285.4	-1.11	3	0.000438
ENSG00000138495	COX17	-1.09	3.73	0.000445
ENSG00000112306	RPS12	-1.69	6.92	0.000448
ENSG00000241529	RN7SL767P	-1.11	2.83	0.000452
ENSG00000206848	RNU6-890P	-1.69	2.88	0.000459
ENSG00000148136	OR13C4	1.35	2.08	0.000463
ENSG00000136238	RAC1	-1.12	5.82	0.000465
ENSG00000124575	H1-3	-1.35	4.16	0.000476
ENSG00000101421	CHMP4B	-1.15	5.02	0.000486
ENSG00000232081	LARGE-IT1	1.13	2.36	0.000494
ENSG00000257848	AC074029.1	1.47	2.1	0.000494
ENSG00000200800	RNU1-130P	-1.81	5.46	0.000497
ENSG00000169567	HINT1	-1.19	3.81	0.00051
ENSG00000186222	BLOC1S4	-1.19	2.44	0.000516
ENSG00000231039	AL355303.1	1.02	2.5	0.000521
ENSG00000227892	OR5P4P	1.27	2.15	0.000526
ENSG00000174970	OR10AG1	1.46	2.09	0.000529
ENSG00000253954	HMGN1P38	-1.34	2.24	0.000534
ENSG00000278771	RN7SL3	-1.98	11.77	0.000538
ENSG00000199994	RNA5SP145	-1.96	9.49	0.00054
ENSG00000275379	H3C11	-1.52	4.16	0.000556
ENSG00000201861	RNA5SP298	-1.93	6.89	0.000558
ENSG00000278189	RNA5-8SN1	-3.33	5.89	0.00056
ENSG00000123975	CKS2	-1.2	2.63	0.000566
ENSG00000256083	AC090673.1	1.23	2.08	0.000568
ENSG00000275236	AC009120.5	1.11	2.63	0.000575
ENSG00000220804	LINC01881	-1.1	3.66	0.000605
ENSG00000258544	GLRXP2	1.21	2.04	0.000607
ENSG00000180233	ZNRF2	-1.13	3.06	0.000619
ENSG00000235499	AC073046.1	-1.08	2.53	0.000626
ENSG00000248396	TOMM22P4	1.12	2.33	0.000626
ENSG00000232472	EEF1B2P3	-1.33	4.07	0.000637
ENSG00000258451	EGILA	1.03	2.69	0.000653
ENSG00000124172	ATP5F1E	-1	6.28	0.000657
ENSG00000253702	LINC02847	1.04	2.42	0.000661
ENSG00000271966	AC021321.1	-1.04	2.06	0.000665
ENSG00000184076	UQCR10	-1.25	3.82	0.000674
ENSG00000112977	DAP	-1.11	5.34	0.000677
ENSG00000178741	COX5A	-1.06	3.23	0.000681
ENSG00000147604	RPL7	-1.44	6.82	0.000694
ENSG00000173915	ATP5MD	-1.06	3.99	0.000706
ENSG00000154723	ATP5PF	-1.02	4.81	0.000716
ENSG00000134602	STK26	-1.16	4.07	0.000725
ENSG00000269097	TPRG1LP1	-1.12	2.43	0.000724
ENSG00000230942	HMGN1P5	1.08	2.15	0.000731
ENSG00000182287	AP1S2	-1.44	5.12	0.000746
ENSG00000251334	AC020593.1	1.02	2.22	0.000746
ENSG00000206177	HBM	-1.42	3.68	0.000755
ENSG00000260052	AC023813.3	1.12	2.37	0.000754
ENSG00000249770	MTND6P17	1.13	2.98	0.000758
ENSG00000196403	OR10D1P	1.01	2.34	0.000759
ENSG00000134308	YWHAQ	-1.25	4.69	0.000763
ENSG00000184009	ACTG1	-1.6	8.57	0.000763
ENSG00000258816	AC121758.3	1.36	2.03	0.000788
ENSG00000188536	HBA2	-1.65	6.95	0.000794
ENSG00000267042	AC100793.2	-1.18	3.02	0.000797
ENSG00000269458	AC022145.2	-1.42	2.15	0.000801
ENSG00000239314	MORC1-AS1	1.06	2.61	0.000803
ENSG00000090382	LYZ	-1.46	5.77	0.000807
ENSG00000163682	RPL9	-1.03	5.65	0.00081
ENSG00000197903	H2BC12	-1.7	6.86	0.000815
ENSG00000185862	EVI2B	-1.63	5.03	0.000845
ENSG00000104131	EIF3J	-1.2	4.26	0.000851
ENSG00000244113	AC079193.1	1.29	2.16	0.000857
ENSG00000125356	NDUFA1	-1.35	3.51	0.000864
ENSG00000182899	RPL35A	-1.17	6.66	0.000863
ENSG00000114784	EIF1B	-1.28	4.44	0.000877
ENSG00000128045	RASL11B	-1.25	2.27	0.00089
ENSG00000196656	AC004057.1	-1.64	2.72	0.000899
ENSG00000201109	RNA5SP245	-1.58	3.08	0.00091
ENSG00000229107	ABHD17AP4	-1.15	2.23	0.000928
ENSG00000155833	CYLC2	1.23	2.57	0.000933
ENSG00000169564	PCBP1	-1.36	5.84	0.000957
ENSG00000228384	AC007040.1	-1.08	2.12	0.000971
ENSG00000239335	LLPH-DT	-1.04	3.21	0.000974
ENSG00000188612	SUMO2	-1.3	5.62	0.000983
ENSG00000185883	ATP6V0C	-1.04	3.15	0.000993
ENSG00000087086	FTL	-1.73	8.77	0.00101
ENSG00000217330	SSXP10	1.28	2.13	0.00101
ENSG00000259837	LINC01904	1.08	2.54	0.00101
ENSG00000106211	HSPB1	-1.23	4.42	0.00108
ENSG00000278558	TMEM191B	-1.24	2.56	0.0011
ENSG00000278678	CYCSP41	1.18	2.24	0.00111
ENSG00000221869	CEBPD	-1.46	2.9	0.00111
ENSG00000196230	TUBB	-1.04	6.11	0.00114
ENSG00000034713	GABARAPL2	-1.15	5.7	0.00114
ENSG00000207005	RNU1-2	3.49	9.08	0.00116
ENSG00000230507	RPL7AP8	1.24	2.14	0.00116
ENSG00000088986	DYNLL1	-1.38	7.01	0.00118
ENSG00000148908	RGS10	-1.63	7.54	0.00118
ENSG00000274618	H4C6	-1.36	4.12	0.00118
ENSG00000229560	LYARP1	1.02	2.78	0.00121
ENSG00000274104	AC020910.5	1.14	2.11	0.00122
ENSG00000222020	HDAC4-AS1	-1.14	2.9	0.00123
ENSG00000183691	NOG	-1.04	2.78	0.00123
ENSG00000166681	BEX3	-1.82	6.97	0.00124
ENSG00000233851	LATS2-AS1	1.03	2.44	0.00124
ENSG00000165119	HNRNPK	-1.21	6.91	0.00125
ENSG00000258748	AL359399.1	-1.08	2.48	0.00125
ENSG00000049245	VAMP3	-1.21	5.03	0.00126
ENSG00000237973	MTCO1P12	-1.54	5.79	0.00126
ENSG00000122643	NT5C3A	-1.6	6.73	0.00133
ENSG00000140299	BNIP2	-1	5.54	0.00133
ENSG00000226221	RPL26P19	-1.3	4.17	0.00138
ENSG00000236098	AC097059.1	1.16	2.3	0.00139
ENSG00000224569	AC095052.1	1.01	2.86	0.00141
ENSG00000279263	OR2L8	1.03	2.15	0.00144
ENSG00000197468	AC073648.1	1.08	2.2	0.00145
ENSG00000201321	RNA5S9	-1.96	10.01	0.00146
ENSG00000243549	RN7SL705P	1.07	2.25	0.00147
ENSG00000168118	RAB4A	-1.15	4.87	0.00148
ENSG00000235215	AL592431.1	1.09	2.29	0.00149
ENSG00000229345	AL392185.1	1.09	2.31	0.00151
ENSG00000254703	SENCR	-1.08	3.94	0.00151
ENSG00000271897	AL357518.1	1.02	2.38	0.00151
ENSG00000248747	AC107220.1	1.01	2.48	0.00152
ENSG00000181524	RPL24P4	-1.1	2.69	0.00154
ENSG00000251920	RNA5SP216	-1.6	5.33	0.00154
ENSG00000262921	AC118754.2	1.09	2.22	0.00154
ENSG00000231593	BX510359.4	1.03	2.41	0.00156
ENSG00000170571	EMB	-1.03	4.49	0.00156
ENSG00000275180	AC048341.2	1.13	2.16	0.00158
ENSG00000276168	RN7SL1	-1.92	13.94	0.00159
ENSG00000229124	VIM-AS1	-1.36	4.91	0.0016
ENSG00000279794	AC024580.2	1.02	2.45	0.00161
ENSG00000206503	HLA-A	-1.14	6.03	0.00164
ENSG00000268543	AC012313.4	1.1	2.51	0.00164
ENSG00000107438	PDLIM1	-1.13	6.84	0.00165
ENSG00000283312	AC017104.4	1.35	2.1	0.00165
ENSG00000120727	PAIP2	-1.26	6.84	0.00166
ENSG00000188229	TUBB4B	-1.17	4.95	0.00168
ENSG00000226716	AL589986.1	1.21	2.17	0.00169
ENSG00000235174	RPL39P3	-1.47	3.01	0.00169
ENSG00000223400	AP006748.1	1.09	2.38	0.00171
ENSG00000188921	HACD4	-1.15	5.77	0.00173
ENSG00000131236	CAP1	-1.12	7.03	0.00173
ENSG00000284622	SCYGR10	-1.1	2.43	0.00174
ENSG00000140264	SERF2	-1.39	8.04	0.00176
ENSG00000184270	H2AC21	-1.3	3.54	0.00177
ENSG00000199480	RNA5SP389	-1.67	4.68	0.00182
ENSG00000140379	BCL2A1	-1.01	3.57	0.00184
ENSG00000216990	HSPD1P10	1.16	2.24	0.00185
ENSG00000200558	RNA5SP429	-1.8	10	0.00186
ENSG00000273149	AL138963.4	-1.1	4.78	0.00186
ENSG00000241383	LINC01997	1.13	2.27	0.00188
ENSG00000070756	PABPC1	-1.33	8.1	0.00188
ENSG00000268509	AC026202.3	-1.19	2.3	0.00189
ENSG00000226540	GAPDHP73	1.01	2.51	0.00194
ENSG00000226411	AC079355.1	1.02	2.14	0.00197
ENSG00000118680	MYL12B	-1.19	6.35	0.00202
ENSG00000224014	AL390728.3	1.05	2.28	0.00203
ENSG00000232723	AC013399.1	1.12	2.05	0.00204
ENSG00000275315	AC141273.3	1.01	2.38	0.00208
ENSG00000253342	AC009623.2	1.11	2.28	0.00209
ENSG00000229117	RPL41	-1.01	5.35	0.0021
ENSG00000169075	Z99496.1	1.22	2.31	0.00217
ENSG00000223360	AC096559.1	1.15	2.15	0.00224
ENSG00000199523	RNA5SP226	-1.6	4.91	0.00226
ENSG00000286102	AP000552.6	-1.07	2.39	0.00227
ENSG00000254612	AP001000.1	-1.18	3.75	0.00227
ENSG00000180913	OR56B3P	1.12	2.29	0.00229
ENSG00000212550	RNU1-78P	-1.39	3.32	0.00232
ENSG00000267401	AC090621.1	1.21	2.14	0.00233
ENSG00000244039	AC008040.3	1.07	2.19	0.00234
ENSG00000158985	CDC42SE2	-1.07	6.32	0.00236
ENSG00000178464	RPL10P16	-1.05	3.3	0.00236
ENSG00000103187	COTL1	-1.15	7.68	0.00238
ENSG00000214988	RPL7AP26	1.14	2.18	0.0024
ENSG00000226645	AP006216.1	1.07	2.06	0.00242
ENSG00000275475	IGHV3-54	1.06	2.43	0.00242
ENSG00000236530	KPNA2P1	1.07	2.52	0.00244
ENSG00000131966	ACTR10	-1.01	4.58	0.00248
ENSG00000278828	H3C10	-1.55	6.55	0.00251
ENSG00000185201	IFITM2	-1.01	5.65	0.00251
ENSG00000163737	PF4	-1.81	10.53	0.00254
ENSG00000184007	PTP4A2	-1.03	6.9	0.00255
