# Supplementary material for: Extracellular-Vesicle-Based Cancer Panels Diagnose Glioblastomas with High Sensitivity and Specificity
Source: Cancers (Basel). 2023 Jul 26;15(15):3782. doi: 10.3390/cancers15153782 (PMC10417317; doi:10.3390/cancers15153782)
Supplement: Supplementary file 1 [file cancers-15-03782-s001.zip › Supplementary_Table S2.xlsx]

## Sheet: IDH1WT_vs_control_LASSO_genes
var	val	gene_name	gene_biotype	chromosome
(Intercept)	1.96124
ENSG00000259366	0.440425	AC108449.2	lncRNA	8
ENSG00000199994	-0.382184	RNA5SP145	rRNA_pseudogene	3
ENSG00000286155	0.368087	FP671120.11	TEC	21
ENSG00000273258	-0.364371	AC016737.2	lncRNA	2
ENSG00000283312	0.358255	AC017104.4	processed_pseudogene	2
ENSG00000231660	-0.310525	RPS8P6	processed_pseudogene	3
ENSG00000286817	0.285369	AC105339.6	lncRNA	15
ENSG00000234779	-0.21512	BNC2-AS1	lncRNA	9
ENSG00000228384	-0.214388	AC007040.1	lncRNA	2
ENSG00000278877	0.210856	AC091932.2	TEC	5
ENSG00000226716	0.197756	AL589986.1	lncRNA	1
ENSG00000236348	0.15795	PSMC1P10	processed_pseudogene	2
ENSG00000287386	0.149365	AC009248.3	lncRNA	12
ENSG00000240350	0.124005	SOCAR	lncRNA	2
ENSG00000163191	0.116091	S100A11	protein_coding	1
ENSG00000100564	-0.0767305	PIGH	protein_coding	14
ENSG00000256357	0.0486148	AL132708.1	lncRNA	14
ENSG00000196976	-0.044436	LAGE3	protein_coding	X
ENSG00000274104	0.0437443	AC020910.5	lncRNA	19
ENSG00000196860	-0.0354077	TOMM20L	protein_coding	14
ENSG00000258670	-0.0242997	AL049874.3	lncRNA	14
ENSG00000251624	-0.0153749	UNC93B7	unprocessed_pseudogene	4
ENSG00000221869	0.0108378	CEBPD	protein_coding	8
ENSG00000169075	0.00408832	Z99496.1	processed_pseudogene	6

## Sheet: TERTmut_IDH1WT_vs_control_LASSO
var	val	gene_name	gene_biotype	chromosome
(Intercept)	3.84423
ENSG00000234779	-0.475884	BNC2-AS1	lncRNA	9
ENSG00000283312	0.469457	AC017104.4	processed_pseudogene	2
ENSG00000287386	0.468168	AC009248.3	lncRNA	12
ENSG00000259366	0.456042	AC108449.2	lncRNA	8
ENSG00000228384	-0.431438	AC007040.1	lncRNA	2
ENSG00000199994	-0.376756	RNA5SP145	rRNA_pseudogene	3
ENSG00000196976	-0.336253	LAGE3	protein_coding	X
ENSG00000253697	-0.269106	AC103834.1	unprocessed_pseudogene	8
ENSG00000251624	-0.246104	UNC93B7	unprocessed_pseudogene	4
ENSG00000273258	-0.22221	AC016737.2	lncRNA	2
ENSG00000228209	0.193181	PNPP1	processed_pseudogene	2
ENSG00000262107	0.164664	MTND6P33	unprocessed_pseudogene	16
ENSG00000286155	0.135904	FP671120.11	TEC	21
ENSG00000224363	0.123683	FP700111.1	lncRNA	1
ENSG00000196860	-0.104373	TOMM20L	protein_coding	14
ENSG00000271966	-0.0657957	AC021321.1	lncRNA	8
ENSG00000240350	0.0540542	SOCAR	lncRNA	2
ENSG00000243352	-0.0454639	RN7SL8P	misc_RNA	7
ENSG00000207005	0.0438423	RNU1-2	snRNA	1
ENSG00000232081	0.0235495	LARGE-IT1	lncRNA	22

## Sheet: MGMTmeth_vs_control_LASSO
var	val	gene_name	gene_biotype	chromosome
(Intercept)	0.883537
ENSG00000199523	-0.290202	RNA5SP226	rRNA_pseudogene	6
ENSG00000278196	0.255106	IGLV2-8	IG_V_gene	22
ENSG00000262107	0.234262	MTND6P33	unprocessed_pseudogene	16
ENSG00000259366	0.208279	AC108449.2	lncRNA	8
ENSG00000234965	-0.206171	SHISA8	protein_coding	22
ENSG00000267472	-0.194929	ARHGAP27P2	processed_pseudogene	17
ENSG00000224014	0.176412	AL390728.3	processed_pseudogene	1
ENSG00000236348	0.109514	PSMC1P10	processed_pseudogene	2
ENSG00000283312	0.072228	AC017104.4	processed_pseudogene	2
ENSG00000251624	-0.0635941	UNC93B7	unprocessed_pseudogene	4
ENSG00000281849	-0.0509602	AL732314.8	lncRNA	X
ENSG00000227220	-0.0441041	AL133346.1	lncRNA	6
ENSG00000228209	0.038377	PNPP1	processed_pseudogene	2
ENSG00000256357	0.0264068	AL132708.1	lncRNA	14
ENSG00000207005	0.0237194	RNU1-2	snRNA	1
ENSG00000199994	-0.00650769	RNA5SP145	rRNA_pseudogene	3
ENSG00000272858	0.0030647	Z93930.3	lncRNA	22

## Sheet: TP53mut_vs_control_LASSO
var	val	gene_name	gene_biotype	chromosome
(Intercept)	3.41175
ENSG00000199523	-0.894773	RNA5SP226	rRNA_pseudogene	6
ENSG00000224014	0.461702	AL390728.3	processed_pseudogene	1
ENSG00000259944	0.310727	CDRT7	lncRNA	17
ENSG00000199994	-0.310697	RNA5SP145	rRNA_pseudogene	3
ENSG00000259366	0.281475	AC108449.2	lncRNA	8
ENSG00000228209	0.25805	PNPP1	processed_pseudogene	2
ENSG00000197364	0.226412	S100A7L2	protein_coding	1
ENSG00000196704	-0.173398	AMZ2	protein_coding	17
ENSG00000268509	-0.139489	AC026202.3	lncRNA	3
ENSG00000233167	0.138876	EEF1A1P26	processed_pseudogene	7
ENSG00000232081	0.0579731	LARGE-IT1	lncRNA	22
ENSG00000248396	0.028614	TOMM22P4	processed_pseudogene	4
ENSG00000128045	-0.022203	RASL11B	protein_coding	4
ENSG00000278196	0.019563	IGLV2-8	IG_V_gene	22
ENSG00000286809	0.00442883	AC008964.1	lncRNA	5
