# Supplementary material for: Extracellular-Vesicle-Based Cancer Panels Diagnose Glioblastomas with High Sensitivity and Specificity
Source: Cancers (Basel). 2023 Jul 26;15(15):3782. doi: 10.3390/cancers15153782 (PMC10417317; doi:10.3390/cancers15153782)
Supplement: Supplementary file 1 [file cancers-15-03782-s001.zip › Supplementary_Table S3.xlsx]

## Sheet: Sheet1
Primers used in genotyping experiments
Gene	Sequence
TERT_forward	CCTGCCCCTTCACCTTCCAG
TERT_reverse	AGGACGCAGCGCTGCCTGAA-biotin
TERT_sequencing	ACCCCGCCCCGTCCCGACCCC
IDH1_forward	TGGGTGGCACGGTCTTCAG
IDH1_reverse	CAAAATCACATTATTGCCAACATGAC-biotin
IDH1_sequencing	GGGTAAAACCTATCATCATA
IDH2_forward	GCCCATCATCTGCAAAAACATC
IDH2_reverse	GGGTGAAGACCATTTTGAAAGTGC-biotin
IDH2_sequencing	AGCCCATCACCATTG
BRAF_forward	GCTTGCTCTGATAGGAAAATGAG
BRAF_reverse	GTAACTCAGCAGCATCTCAGG-biotin
BRAF_sequencing	GGTGATTTTGGTCTAGC
H3F3A_forward	CAATGCTGGTAGGTAAGTAAGGAGGTC
H3F3A_reverse	CCTGTAACGATGAGGTTTCTTCACC-biotin
H3F3A_sequencing	CAAAAGCCGCTCGCA
